# Supplementary material for: Breastfeeding in Infancy in Relation to Subsequent Physical Size: A 20-year Follow-up of the Ibaraki Children’s Cohort Study (IBACHIL)
Source: PubMed Central journal article supplement (PMC9794444; doi:10.2188/jea.je20200562), 2023-02-05
Supplement: je-33-063-s001.pdf [file je-33-063-s001.pdf]

**eTable 1.** Sex-specific mean values (standard deviations) and proportions of baseline characteristics at age of 6 years between participants and non-participants

| Types of feeding                            | Boys                      |                               | Girls                   |                               |
|---------------------------------------------|---------------------------|-------------------------------|-------------------------|-------------------------------|
|                                             | Participants<br>(n=1,061) | Non-Participants<br>(n=1,197) | Participants<br>(n=938) | Non-Participants<br>(n=1,094) |
| Formula feeding, %                          | 41.8                      | 42.0                          | 39.1                    | 39.9                          |
| Mixed feeding, %                            | 27.0                      | 30.2                          | 28.5                    | 28.1                          |
| Breast feeding, %                           | 31.2                      | 27.8                          | 32.4                    | 32.0                          |
| Birth height, cm                            | 50.0 (1.8)                | 50.1 (1.9)                    | 49.4 (1.8)              | 49.5 (1.8)                    |
| Birth weight, kg                            | 3.3 (0.4)                 | 3.2 (0.4)                     | 3.1 (0.3)               | 3.2 (0.3)                     |
| Height at age of 3 years                    | 94.9 (3.5)                | 94.9 (3.6)                    | 93.5 (3.4)              | 93.7 (3.5)                    |
| Weight at age of 3 years                    | 14.7 (1.6)                | 14.7 (1.7)                    | 14.1 (1.6)              | 14.2 (1.7)                    |
| Body mass index at age of 3 years           | 16.3 (1.2)                | 16.3 (1.3)                    | 16.1 (1.2)              | 16.1 (1.3)                    |
| Overweight at age of 3 years                | 8.1                       | 8.4                           | 11.6                    | 12.0                          |
| Having brothers or sisters, %               | 78.0                      | 78.7                          | 77.7                    | 76.8                          |
| Waking up late $\geq 9$ am, %               | 4.2                       | 4.1                           | 6.5                     | 5.3                           |
| Sleeping late $\geq 11$ pm, %               | 5.0                       | 5.7                           | 6.3                     | 5.4                           |
| Active body movements, %                    | 90.7                      | 92.7                          | 88.9                    | 89.8                          |
| Playing outside, %                          | 94.9                      | 95.0                          | 94.5                    | 94.7                          |
| Paternal height, cm                         | 170.5 (5.6)               | 170.7 (5.5)                   | 170.1 (5.5)             | 170.5 (5.6)                   |
| Paternal weight, kg                         | 67.1 (9.4)                | 67.4 (9.4)                    | 67.3 (9.2)              | 66.9 (9.2)                    |
| Paternal body mass Index, kg/m <sup>2</sup> | 23.1 (2.8)                | 23.1 (2.9)                    | 23.3 (2.8)              | 23.0 (2.7)                    |
| Paternal overweight, %                      | 22.7                      | 23.5                          | 25.1                    | 21.6                          |
| Father employed, %                          | 84.1                      | 81.3                          | 81.0                    | 82.4                          |
| Maternal height, cm                         | 157.1 (5.0)               | 157.5 (5.1)                   | 157.3 (5.0)             | 157.1 (4.8)                   |
| Maternal weight, kg                         | 52.6 (6.8)                | 52.6 (7.2)                    | 52.3 (6.6)              | 52.3 (6.9)                    |
| Maternal body mass Index, kg/m <sup>2</sup> | 21.3 (2.6)                | 21.2 (2.6)                    | 21.1 (2.5)              | 21.2 (2.6)                    |
| Maternal overweight, %                      | 8.3                       | 8.2                           | 7.3                     | 8.6                           |
| Mother employed, %                          | 21.1                      | 21.6                          | 22.3                    | 21.5                          |

\* $P < 0.05$ , \*\* $P < 0.01$ , \*\*\* $P < 0.001$ , compared with participants, tested using the Student t-test or chi-square analysis

“Non-participants” refers to those who dropped out of the study at the age of 6 years.

**eTable 2.** Sex-specific mean values (standard deviations) and proportions of baseline characteristics at age of 12 years between participants and non-participants

| Types of feeding                            | Boys                      |                               | Girls                   |                               |
|---------------------------------------------|---------------------------|-------------------------------|-------------------------|-------------------------------|
|                                             | Participants<br>(n=1,234) | Non-Participants<br>(n=1,024) | Participants<br>(n=993) | Non-Participants<br>(n=1,039) |
| Formula feeding, %                          | 42.1                      | 41.6                          | 41.0                    | 38.2                          |
| Mixed feeding, %                            | 27.3                      | 30.4                          | 27.1                    | 29.4                          |
| Breast feeding, %                           | 30.6                      | 28.0                          | 31.9                    | 32.4                          |
| Birth height, cm                            | 50.1 (1.8)                | 50.1 (1.9)                    | 49.4 (1.9)              | 49.4 (1.8)                    |
| Birth weight, kg                            | 3.3 (0.4)                 | 3.2 (0.4)                     | 3.2 (0.4)               | 3.1 (0.3)                     |
| Height at age of 3 years                    | 94.9 (3.5)                | 94.9 (3.6)                    | 93.6 (3.3)              | 93.5 (3.5)                    |
| Weight at age of 3 years                    | 14.7 (1.6)                | 14.7 (1.8)                    | 14.1 (1.6)              | 14.1 (1.7)                    |
| Body mass index at age of 3 years           | 16.3 (1.2)                | 16.3 (1.3)                    | 16.1 (1.2)              | 16.1 (1.3)                    |
| Overweight at age of 3 years                | 7.9                       | 8.7                           | 12.2                    | 11.5                          |
| Having brothers or sisters, %               | 80.6                      | 75.7**                        | 81.6                    | 73.1***                       |
| Waking up late $\geq 9$ am, %               | 3.6                       | 4.9                           | 5.2                     | 6.4                           |
| Sleeping late $\geq 11$ pm, %               | 4.4                       | 6.5*                          | 4.9                     | 6.6                           |
| Active body movements, %                    | 91.8                      | 91.7                          | 90.1                    | 88.6                          |
| Playing outside, %                          | 94.4                      | 95.6                          | 96.1                    | 93.2*                         |
| Paternal height, cm                         | 170.5 (5.6)               | 170.8 (5.6)                   | 170.1 (5.5)             | 170.5 (5.6)                   |
| Paternal weight, kg                         | 67.1 (9.3)                | 67.4 (9.5)                    | 67.1 (8.8)              | 67.1 (9.5)                    |
| Paternal body mass Index, kg/m <sup>2</sup> | 23.1 (2.8)                | 23.1 (3.0)                    | 23.2 (2.7)              | 23.1 (2.8)                    |
| Paternal overweight, %                      | 23.0                      | 23.3                          | 22.9                    | 23.6                          |
| Father employed, %                          | 82.7                      | 82.4                          | 80.2                    | 83.3                          |
| Maternal height, cm                         | 157.0 (5.0)               | 157.6 (5.1)**                 | 157.2 (4.9)             | 157.2 (4.9)                   |
| Maternal weight, kg                         | 52.5 (6.9)                | 52.8 (7.2)                    | 52.2 (6.5)              | 52.4 (7.0)                    |
| Maternal body mass Index, kg/m <sup>2</sup> | 21.3 (2.5)                | 21.2 (2.7)                    | 21.1 (2.5)              | 21.2 (2.7)                    |
| Maternal overweight, %                      | 7.8                       | 8.8                           | 7.7                     | 8.3                           |
| Mother employed, %                          | 24.6                      | 17.5***                       | 24.4                    | 19.4**                        |

\* $P < 0.05$ , \*\* $P < 0.01$ , \*\*\* $P < 0.001$ , compared with participants, tested using the Student t-test or chi-square analysis

“Non-participants” refers to those who dropped out of the study at the age of 12 years.

**eTable 3.** Sex-specific mean values (standard deviations) and proportions of baseline characteristics at age of 22 years between participants and non-participants

| Types of feeding                            | Boys                    |                               | Girls                   |                               |
|---------------------------------------------|-------------------------|-------------------------------|-------------------------|-------------------------------|
|                                             | Participants<br>(n=771) | Non-Participants<br>(n=1,487) | Participants<br>(n=688) | Non-Participants<br>(n=1,344) |
| Formula feeding, %                          | 39.7                    | 43.0                          | 41.1                    | 38.8                          |
| Mixed feeding, %                            | 28.8                    | 28.6                          | 27.8                    | 28.5                          |
| Breast feeding, %                           | 31.5                    | 28.3                          | 31.1                    | 32.7                          |
| Birth height, cm                            | 50.1 (1.9)              | 50.1 (1.8)                    | 49.4 (2.0)              | 49.4 (1.8)                    |
| Birth weight, kg                            | 3.3 (0.4)               | 3.3 (0.4)                     | 3.2 (0.3)               | 3.2 (0.4)                     |
| Height at age of 3 years                    | 95.0 (3.4)              | 94.9 (3.6)                    | 93.7 (3.4)              | 93.5 (3.5)                    |
| Weight at age of 3 years                    | 14.7 (1.5)              | 14.7 (1.8)                    | 14.2 (1.6)              | 14.1 (1.7)                    |
| Body mass index at age of 3 years           | 16.3 (1.2)              | 16.3 (1.3)                    | 16.2 (1.2)              | 16.1 (1.3)                    |
| Overweight at age of 3 years                | 7.7                     | 8.6                           | 12.2                    | 11.6                          |
| Having brothers or sisters, %               | 81.6                    | 76.7**                        | 80.4                    | 75.6*                         |
| Waking up late $\geq 9$ am, %               | 3.2                     | 4.6                           | 5.8                     | 5.9                           |
| Sleeping late $\geq 11$ pm, %               | 3.9                     | 6.1*                          | 4.5                     | 6.5                           |
| Active body movements, %                    | 92.3                    | 91.5                          | 87.5                    | 90.3                          |
| Playing outside, %                          | 94.9                    | 95.0                          | 95.2                    | 94.3                          |
| Paternal height, cm                         | 170.4 (5.7)             | 170.7 (5.5)                   | 170.2 (5.4)             | 170.4 (5.6)                   |
| Paternal weight, kg                         | 66.8 (9.4)              | 67.5 (9.4)                    | 67.1 (9.0)              | 67.1 (9.3)                    |
| Paternal body mass Index, kg/m <sup>2</sup> | 23.0 (2.8)              | 23.2 (3.0)                    | 23.2 (2.7)              | 23.1 (2.8)                    |
| Paternal overweight, %                      | 21.1                    | 24.2                          | 23.1                    | 23.3                          |
| Father employed, %                          | 83.3                    | 82.2                          | 81.1                    | 82.1                          |
| Maternal height, cm                         | 157.1 (5.1)             | 157.4 (5.1)                   | 157.2 (4.9)             | 157.2 (4.9)                   |
| Maternal weight, kg                         | 52.4 (6.7)              | 52.7 (7.2)                    | 52.4 (6.7)              | 52.2 (6.8)                    |
| Maternal body mass Index, kg/m <sup>2</sup> | 21.2 (2.4)              | 21.3 (2.7)                    | 21.2 (2.5)              | 21.1 (2.6)                    |
| Maternal overweight, %                      | 7.6                     | 8.6                           | 8.2                     | 7.9                           |
| Mother employed, %                          | 24.8                    | 19.6**                        | 24.1                    | 20.7                          |

\* $P < 0.05$ , \*\* $P < 0.01$ , \*\*\* $P < 0.001$ , compared with participants, tested using the Student t-test or chi-square analysis

“Non-participants” refers to those who dropped out of the study at the age of 22 years.

**eTable 4.** Sex-specific mean values (standard deviations) and proportions of baseline characteristics among participants at age of 6 years

| Types of feeding                                     | Boys                       |                          |                           | Girls                      |                          |                           |
|------------------------------------------------------|----------------------------|--------------------------|---------------------------|----------------------------|--------------------------|---------------------------|
|                                                      | Formula feeding<br>(n=443) | Mixed feeding<br>(n=287) | Breast feeding<br>(n=331) | Formula feeding<br>(n=367) | Mixed feeding<br>(n=267) | Breast feeding<br>(n=304) |
| Birth height, cm                                     | 50.0 (1.9)                 | 50.2 (1.8)               | 50.0 (1.7)                | 49.2 (1.7)                 | 49.3 (1.9)               | 49.6 (1.9)**              |
| Birth weight, kg                                     | 3.2 (0.4)                  | 3.3 (0.4)                | 3.3 (0.4)                 | 3.1 (0.3)                  | 3.2 (0.4)*               | 3.2 (0.3)*                |
| Height at age of 3 years, cm                         | 94.9 (3.5)                 | 95.1 (3.3)               | 94.7 (3.5)                | 93.4 (3.3)                 | 93.7 (3.5)               | 93.4 (3.3)                |
| Weight at age of 3 years, kg                         | 14.7 (1.6)                 | 14.8 (1.6)               | 14.6 (1.6)                | 14.1 (1.6)                 | 14.2 (1.6)               | 14.0 (1.6)                |
| Body mass index at age of 3 years, kg/m <sup>2</sup> | 16.3 (1.2)                 | 16.3 (1.2)               | 16.2 (1.1)                | 16.2 (1.2)                 | 16.1 (1.2)               | 16.0 (1.2)                |
| Overweight at age of 3 years, %                      | 9.3                        | 8.9                      | 5.8                       | 13.3                       | 9.6                      | 11.5                      |
| Having brothers or sisters, %                        | 73.1                       | 79.1                     | 83.4***                   | 77.7                       | 73.4                     | 81.6                      |
| Waking up late $\geq$ 9 am, %                        | 5.2                        | 3.5                      | 3.6                       | 6.8                        | 6.4                      | 6.3                       |
| Sleeping late $\geq$ 11 pm, %                        | 5.2                        | 4.2                      | 5.4                       | 5.7                        | 7.9                      | 5.6                       |
| Active body movements, %                             | 89.4                       | 92.7                     | 90.6                      | 89.1                       | 90.6                     | 87.2                      |
| Playing outside, %                                   | 92.6                       | 96.2*                    | 97.0**                    | 94.0                       | 94.0                     | 95.4                      |
| Paternal height, cm                                  | 170.2 (5.5)                | 170.4 (6.0)              | 171.1 (5.4)*              | 170.1 (5.4)                | 169.8 (5.6)              | 170.4 (5.6)               |
| Paternal weight, kg                                  | 66.3 (9.4)                 | 68.2 (10.1)**            | 67.4 (8.7)                | 66.9 (8.8)                 | 67.3 (9.5)               | 67.8 (9.3)                |
| Paternal body mass Index, kg/m <sup>2</sup>          | 22.8 (2.9)                 | 23.5 (2.9)**             | 23.0 (2.7)                | 23.1 (2.7)                 | 23.3 (2.9)               | 23.3 (2.8)                |
| Paternal overweight, %                               | 20.3                       | 27.2*                    | 22.0                      | 21.1                       | 28.3*                    | 27.2                      |
| Father employed, %                                   | 83.5                       | 87.1                     | 82.2                      | 82.3                       | 80.5                     | 79.9                      |
| Maternal height, cm                                  | 156.9 (5.2)                | 157.1 (4.8)              | 157.4 (4.9)               | 157.1 (4.9)                | 157.5 (5.1)              | 157.2 (4.9)               |
| Maternal weight, kg                                  | 52.8 (7.6)                 | 52.8 (6.7)               | 52.2 (5.8)                | 52.3 (6.7)                 | 52.4 (6.5)               | 52.2 (6.5)                |
| Maternal body mass Index, kg/m <sup>2</sup>          | 21.4 (2.8)                 | 21.4 (2.5)               | 21.1 (2.1)*               | 21.2 (2.5)                 | 21.1 (2.4)               | 21.1 (2.5)                |
| Maternal overweight, %                               | 11.0                       | 8.1                      | 4.9**                     | 8.0                        | 6.8                      | 7.0                       |
| Mother employed, %                                   | 27.1                       | 22.3                     | 12.1***                   | 25.3                       | 27.3                     | 14.1***                   |

\* $P < 0.05$ , \*\* $P < 0.01$ , \*\*\* $P < 0.001$ , compared with formula feeding, tested using the analysis of variance

**eTable 5.** Sex-specific mean values (standard deviations) and proportions of baseline characteristics among participants at age of 12 years

| Types of feeding                                     | Boys                       |                          |                           | Girls                      |                          |                           |
|------------------------------------------------------|----------------------------|--------------------------|---------------------------|----------------------------|--------------------------|---------------------------|
|                                                      | Formula feeding<br>(n=520) | Mixed feeding<br>(n=337) | Breast feeding<br>(n=377) | Formula feeding<br>(n=407) | Mixed feeding<br>(n=269) | Breast feeding<br>(n=317) |
| Birth height, cm                                     | 50.0 (1.8)                 | 50.1 (1.8)               | 50.1 (1.7)                | 49.4 (1.8)                 | 49.4 (1.9)               | 49.6 (2.1)                |
| Birth weight, kg                                     | 3.2 (0.4)                  | 3.3 (0.4)                | 3.3 (0.4)                 | 3.1 (0.4)                  | 3.2 (0.4)                | 3.2 (0.3)                 |
| Height at age of 3 years, cm                         | 94.9 (3.5)                 | 94.9 (3.5)               | 94.8 (3.4)                | 93.6 (3.4)                 | 93.9 (3.4)               | 93.4 (3.2)                |
| Weight at age of 3 years, kg                         | 14.7 (1.7)                 | 14.8 (1.6)               | 14.6 (1.5)                | 14.2 (1.6)                 | 14.2 (1.6)               | 14.0 (1.5)                |
| Body mass index at age of 3 years, kg/m <sup>2</sup> | 16.3 (1.3)                 | 16.4 (1.2)               | 16.2 (1.1)                | 16.2 (1.3)                 | 16.1 (1.3)               | 16.0 (1.2)*               |
| Overweight at age of 3 years, %                      | 9.6                        | 8.4                      | 5.1*                      | 14.4                       | 11.5                     | 10.0                      |
| Having brothers or sisters, %                        | 76.9                       | 81.6                     | 84.6**                    | 80.8                       | 79.6                     | 84.2                      |
| Waking up late $\geq$ 9 am, %                        | 4.4                        | 3.0                      | 2.9                       | 5.4                        | 3.7                      | 6.3                       |
| Sleeping late $\geq$ 11 pm, %                        | 4.2                        | 3.6                      | 5.3                       | 4.2                        | 5.9                      | 5.0                       |
| Active body movements, %                             | 90.4                       | 93.5                     | 92.3                      | 91.4                       | 90.3                     | 88.3                      |
| Playing outside, %                                   | 93.8                       | 94.7                     | 95.0                      | 95.3                       | 95.9                     | 97.2                      |
| Paternal height, cm                                  | 170.2 (5.6)                | 170.4 (5.5)              | 171.0 (5.6)*              | 170.0 (5.6)                | 170.0 (5.2)              | 170.4 (5.7)               |
| Paternal weight, kg                                  | 66.5 (9.3)                 | 67.7 (9.7)               | 67.4 (9.0)                | 66.5 (8.9)                 | 67.3 (8.6)               | 67.7 (9.0)                |
| Paternal body mass Index, kg/m <sup>2</sup>          | 22.9 (2.8)                 | 23.3 (2.9)               | 23.1 (2.8)                | 23.0 (2.7)                 | 23.3 (2.7)               | 23.3 (2.8)                |
| Paternal overweight, %                               | 21.9                       | 25.2                     | 22.5                      | 19.8                       | 26.7*                    | 23.7                      |
| Father employed, %                                   | 83.3                       | 83.4                     | 81.4                      | 82.3                       | 80.7                     | 77.0                      |
| Maternal height, cm                                  | 156.7 (5.2)                | 157.2 (4.8)              | 157.3 (5.0)*              | 157.0 (5.0)                | 157.4 (4.9)              | 157.2 (4.6)               |
| Maternal weight, kg                                  | 52.6 (7.6)                 | 52.5 (6.6)               | 52.3 (6.1)                | 52.4 (6.6)                 | 52.5 (6.4)               | 51.8 (6.4)                |
| Maternal body mass Index, kg/m <sup>2</sup>          | 21.4 (2.8)                 | 21.3 (2.4)               | 21.1 (2.2)                | 21.2 (2.5)                 | 21.2 (2.4)               | 20.9 (2.4)                |
| Maternal overweight, %                               | 10.2                       | 6.3*                     | 6.0*                      | 8.2                        | 8.0                      | 6.7                       |
| Mother employed, %                                   | 29.0                       | 27.6                     | 15.6***                   | 27.8                       | 30.9                     | 14.5***                   |

\* $P < 0.05$ , \*\* $P < 0.01$ , \*\*\* $P < 0.001$ , compared with formula feeding, tested using the analysis of variance

**eTable 6.** Sex-specific mean values (standard deviations) and proportions of baseline characteristics among participants at age of 22 years

| Types of feeding                                     | Boys                       |                          |                           | Girls                      |                          |                           |
|------------------------------------------------------|----------------------------|--------------------------|---------------------------|----------------------------|--------------------------|---------------------------|
|                                                      | Formula feeding<br>(n=306) | Mixed feeding<br>(n=222) | Breast feeding<br>(n=243) | Formula feeding<br>(n=283) | Mixed feeding<br>(n=191) | Breast feeding<br>(n=214) |
| Birth height, cm                                     | 50.0 (1.9)                 | 50.1 (1.9)               | 50.2 (1.7)                | 49.3 (1.9)                 | 49.5 (1.8)               | 49.4 (2.2)                |
| Birth weight, kg                                     | 3.2 (0.4)                  | 3.3 (0.4)                | 3.3 (0.4)*                | 3.1 (0.3)                  | 3.2 (0.3)                | 3.2 (0.3)                 |
| Height at age of 3 years, cm                         | 95.0 (3.5)                 | 94.9 (3.1)               | 94.9 (3.5)                | 93.8 (3.4)                 | 93.9 (3.3)               | 93.5 (3.3)                |
| Weight at age of 3 years, kg                         | 14.7 (1.5)                 | 14.8 (1.5)               | 14.6 (1.5)                | 14.2 (1.6)                 | 14.3 (1.5)               | 14.1 (1.5)                |
| Body mass index at age of 3 years, kg/m <sup>2</sup> | 16.2 (1.2)                 | 16.4 (1.1)*              | 16.2 (1.2)                | 16.2 (1.3)                 | 16.2 (1.1)               | 16.1 (1.2)                |
| Overweight at age of 3 years, %                      | 7.9                        | 9.6                      | 5.5                       | 14.1                       | 10.2                     | 11.5                      |
| Having brothers or sisters, %                        | 77.8                       | 81.5                     | 86.4**                    | 75.6                       | 82.7                     | 84.6*                     |
| Waking up late $\geq$ 9 am, %                        | 3.9                        | 3.2                      | 2.5                       | 6.0                        | 5.2                      | 6.1                       |
| Sleeping late $\geq$ 11 pm, %                        | 3.6                        | 3.6                      | 4.5                       | 5.3                        | 5.8                      | 2.3                       |
| Active body movements, %                             | 92.5                       | 93.7                     | 90.9                      | 88.3                       | 88.0                     | 86.0                      |
| Playing outside, %                                   | 94.8                       | 93.7                     | 96.3                      | 94.3                       | 95.3                     | 96.3                      |
| Paternal height, cm                                  | 170.3 (5.7)                | 170.2 (5.8)              | 170.7 (5.8)               | 170.1 (5.3)                | 170.1 (5.1)              | 170.5 (6.0)               |
| Paternal weight, kg                                  | 66.6 (9.7)                 | 67.1 (9.9)               | 66.7 (8.5)                | 66.5 (8.6)                 | 67.2 (8.7)               | 67.9 (9.8)                |
| Paternal body mass Index, kg/m <sup>2</sup>          | 22.9 (2.9)                 | 23.2 (2.8)               | 22.9 (2.6)                | 23.0 (2.7)                 | 23.2 (2.7)               | 23.3 (2.8)                |
| Paternal overweight, %                               | 20.1                       | 23.0                     | 20.7                      | 18.9                       | 27.8*                    | 24.6                      |
| Father employed, %                                   | 83.3                       | 86.5                     | 80.2                      | 83.7                       | 80.6                     | 78.0                      |
| Maternal height, cm                                  | 156.7 (5.2)                | 157.1 (4.8)              | 157.5 (5.2)               | 157.2 (4.9)                | 157.4 (5.2)              | 157.0 (4.4)               |
| Maternal weight, kg                                  | 52.2 (7.3)                 | 52.6 (6.4)               | 52.4 (6.1)                | 52.1 (6.8)                 | 52.7 (6.1)               | 52.6 (7.0)                |
| Maternal body mass Index, kg/m <sup>2</sup>          | 21.2 (2.7)                 | 21.3 (2.3)               | 21.1 (2.2)                | 21.1 (2.6)                 | 21.3 (2.3)               | 21.3 (2.6)                |
| Maternal overweight, %                               | 10.2                       | 6.0                      | 5.9                       | 7.5                        | 8.0                      | 9.5                       |
| Mother employed, %                                   | 29.7                       | 28.8                     | 14.8***                   | 25.8                       | 30.9                     | 15.9*                     |

\* $P < 0.05$ , \*\* $P < 0.01$ , \*\*\* $P < 0.001$ , compared with formula feeding, tested using the analysis of variance
